# Supplementary material for: Madecassic acid, the contributor to the anti-colitis effect of madecassoside, enhances the shift of Th17 toward Treg cells via the PPARγ/AMPK/ACC1 pathway
Source: PubMed Central journal article supplement (PMC5386545; doi:10.1038/cddis.2017.150), 2017-03-30

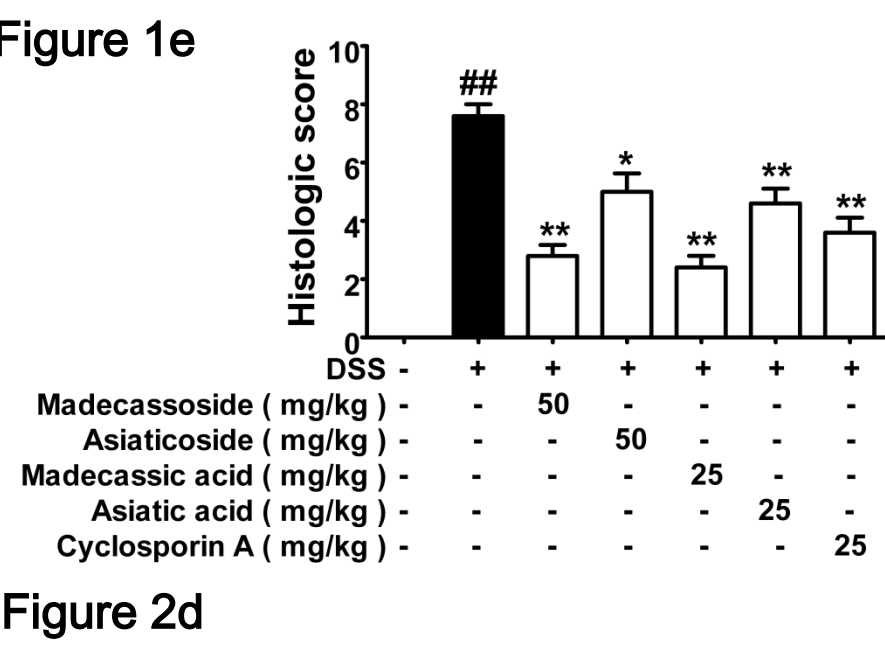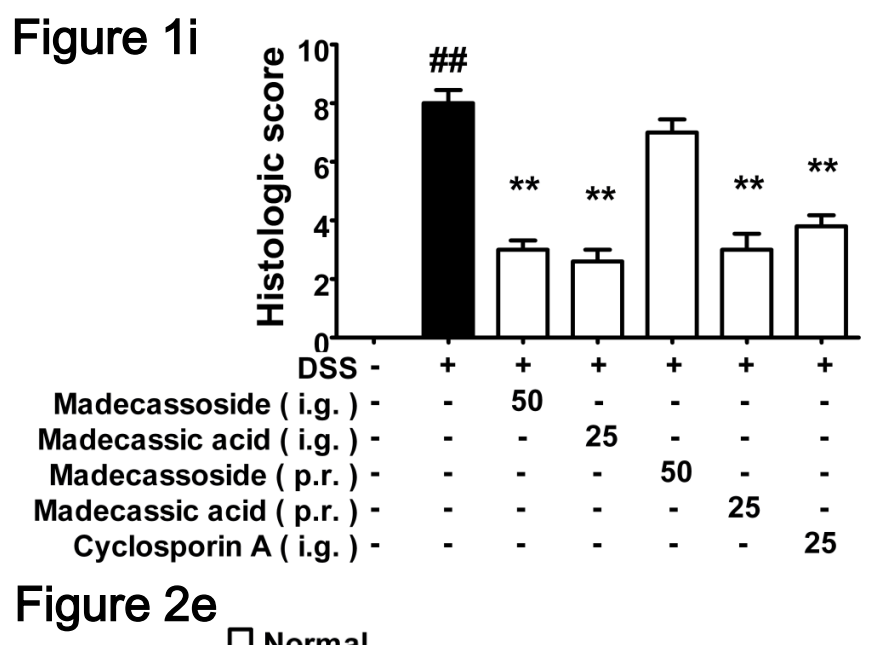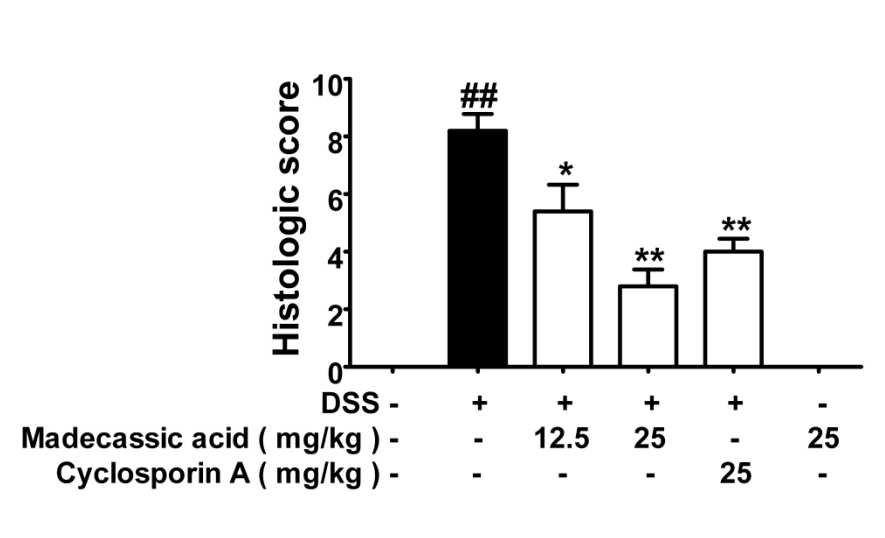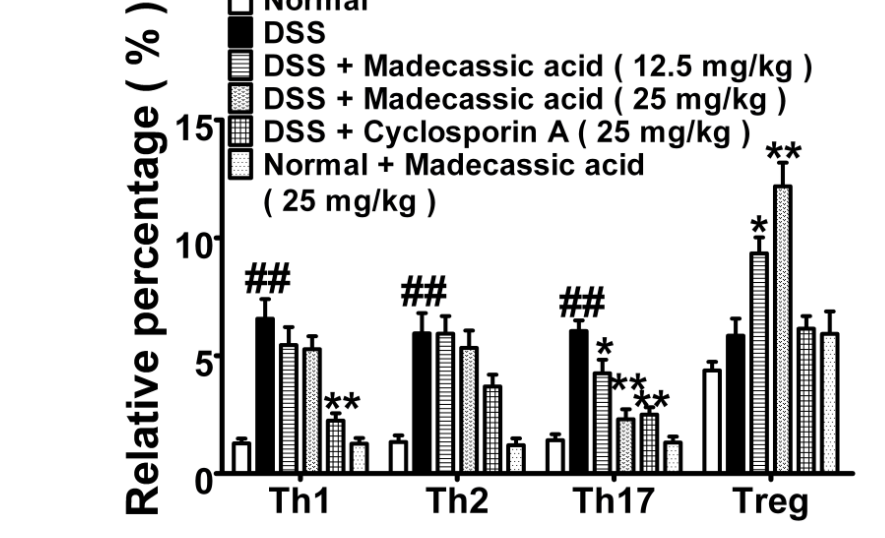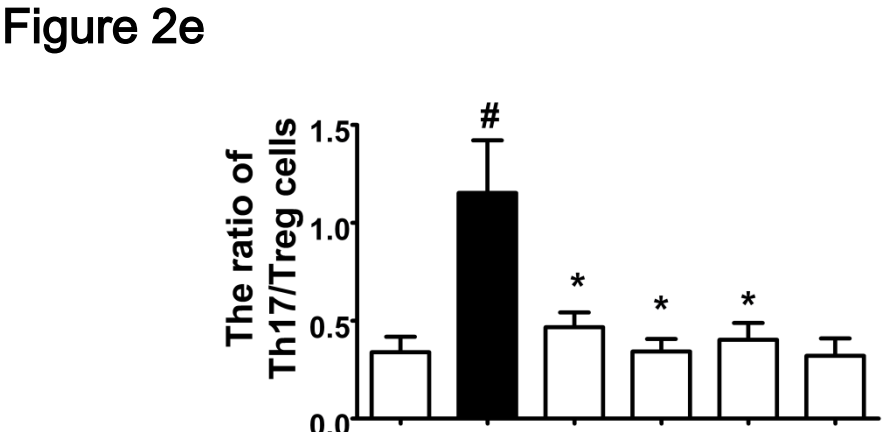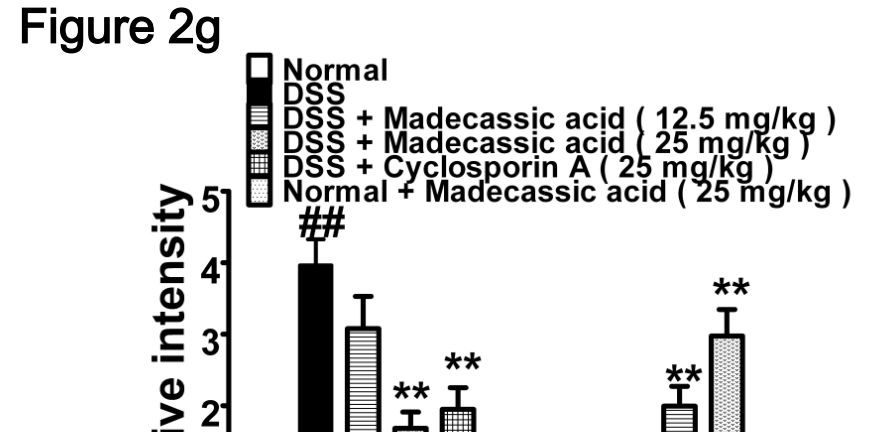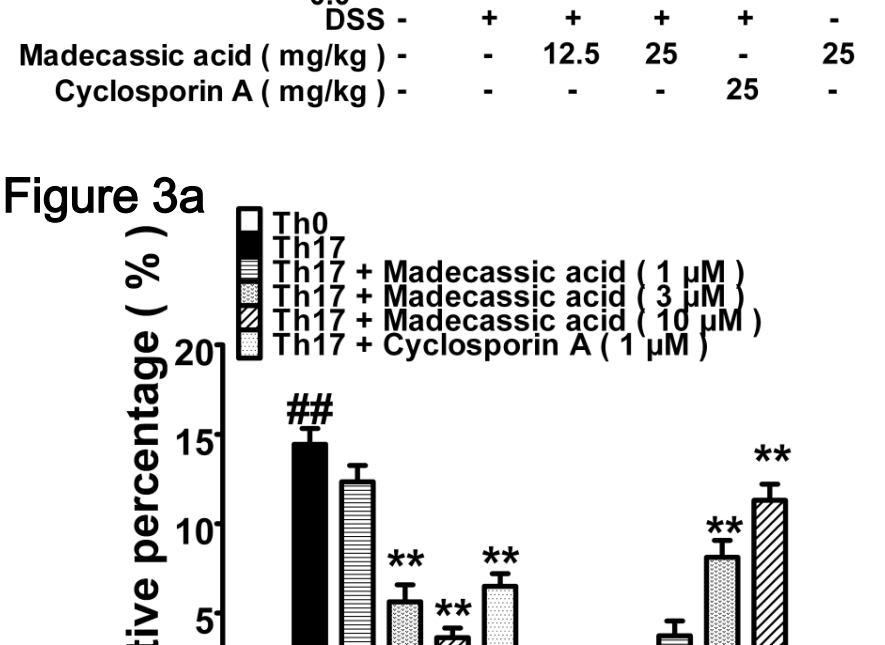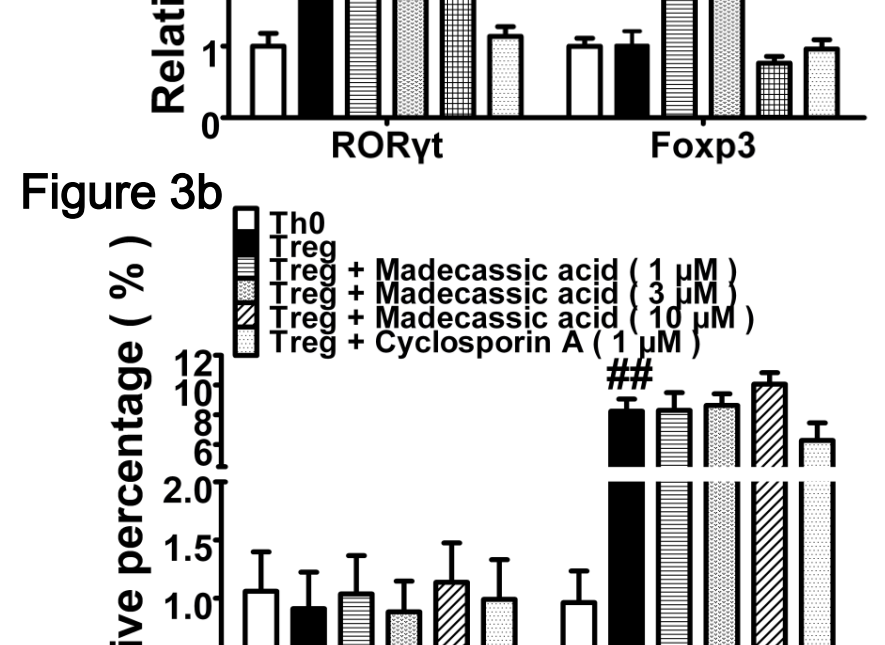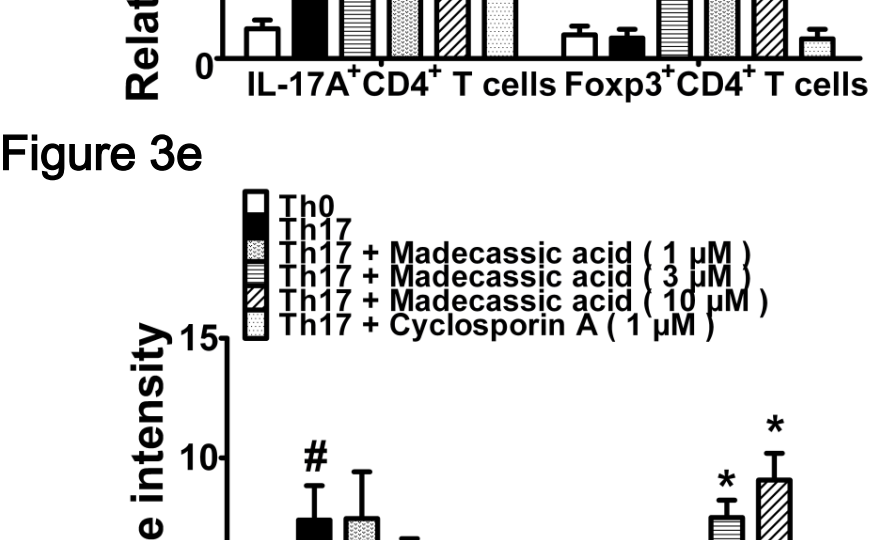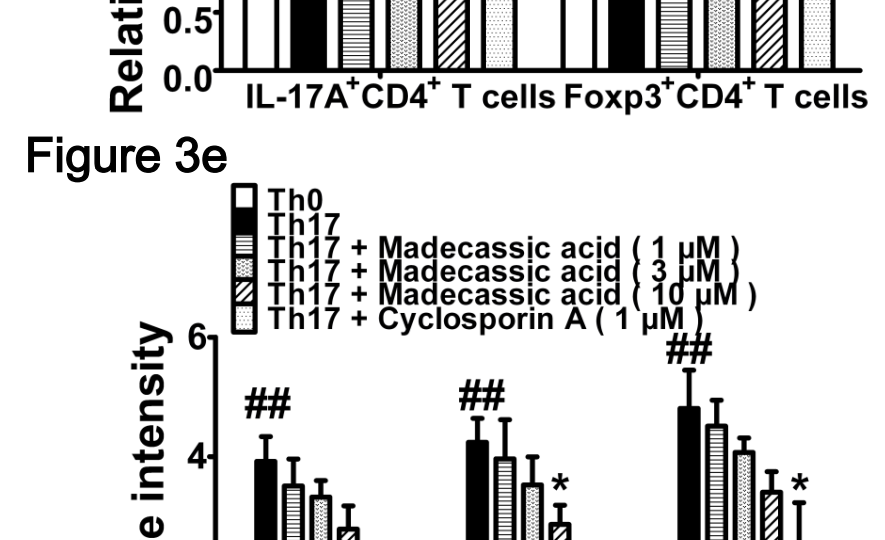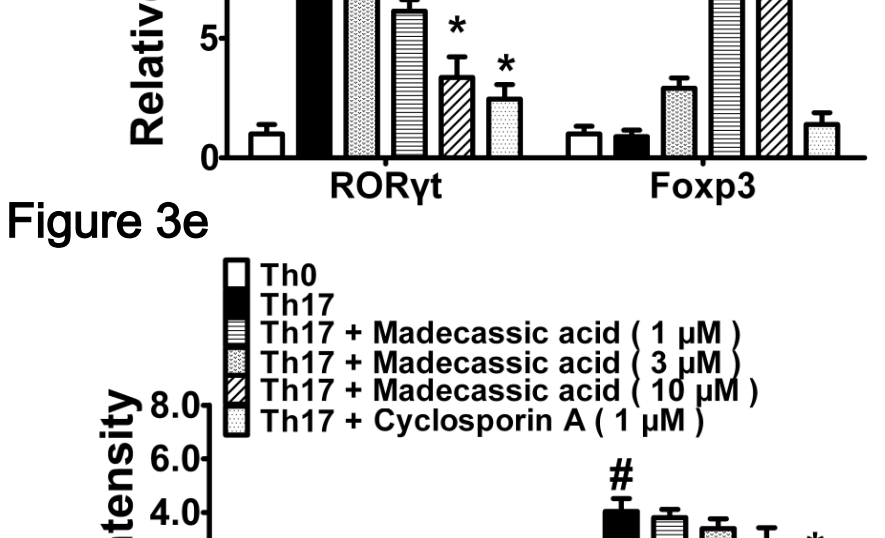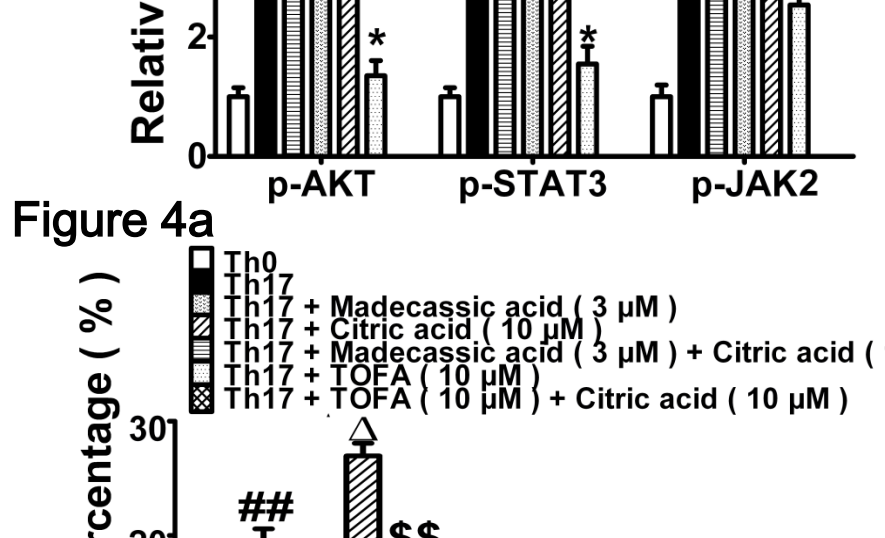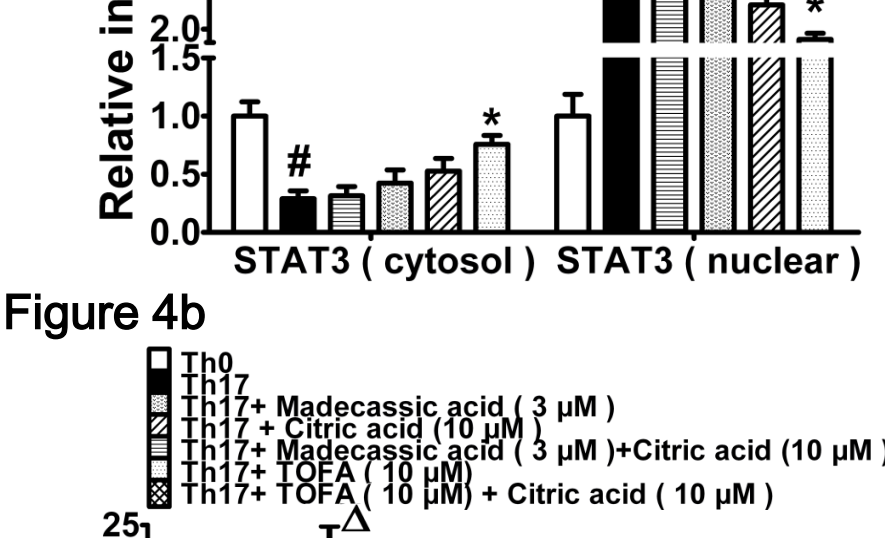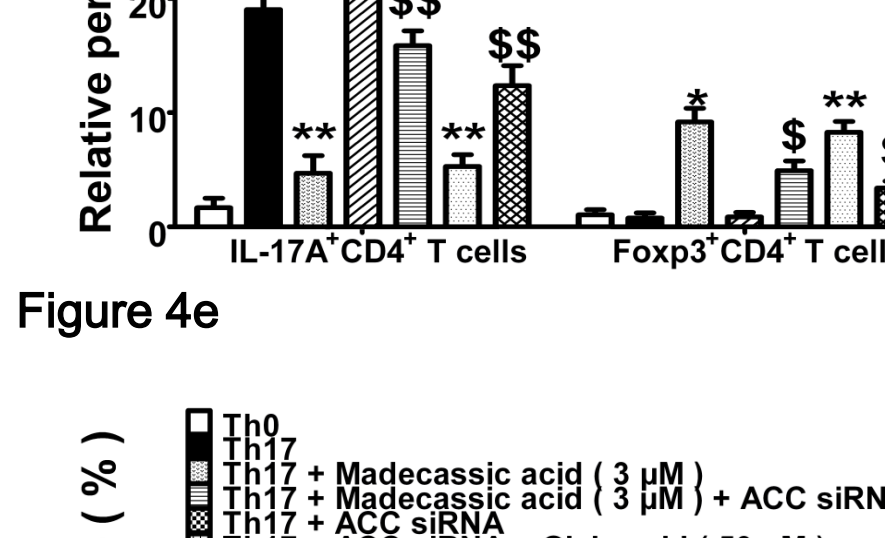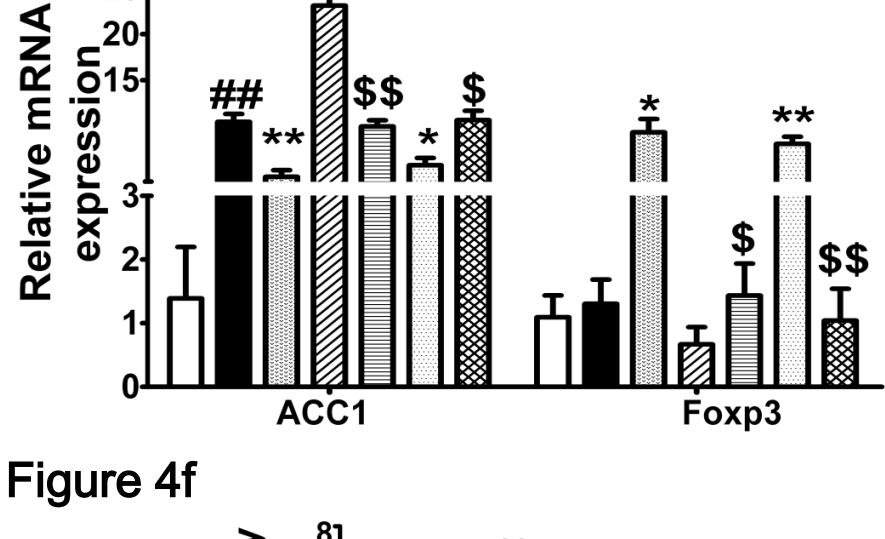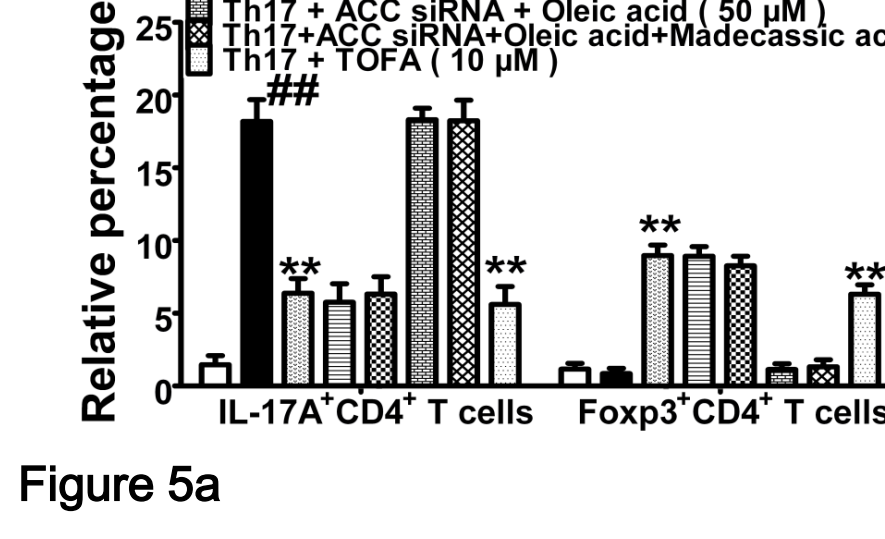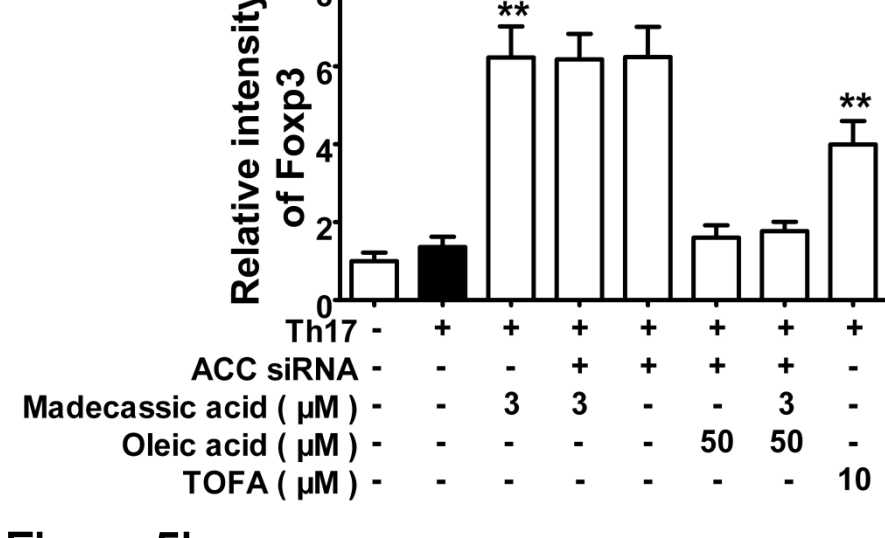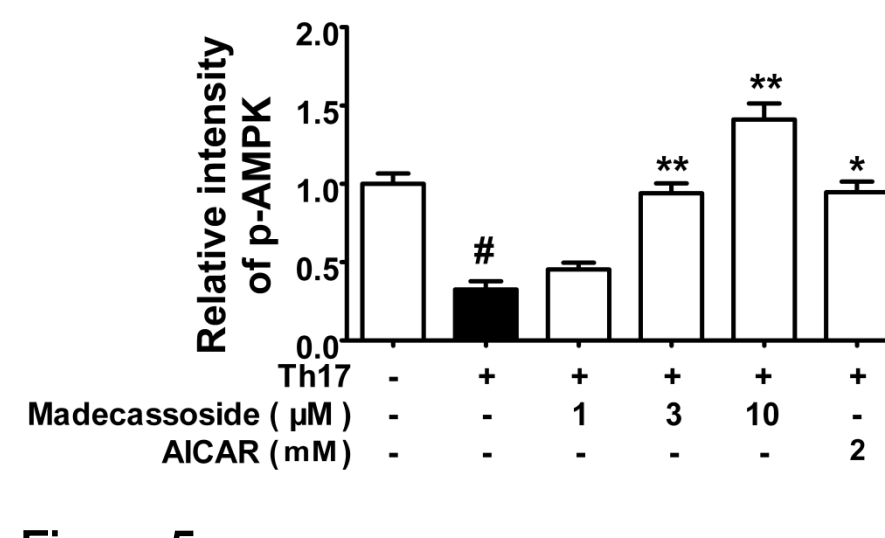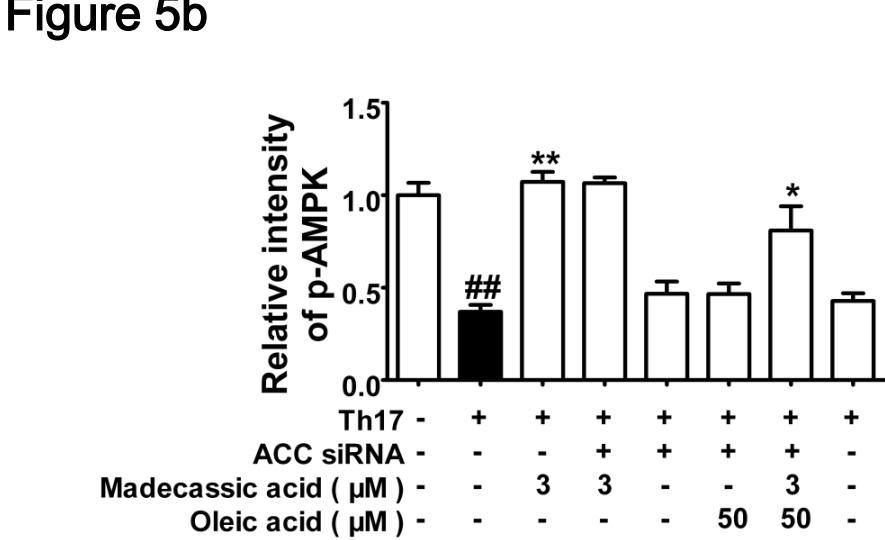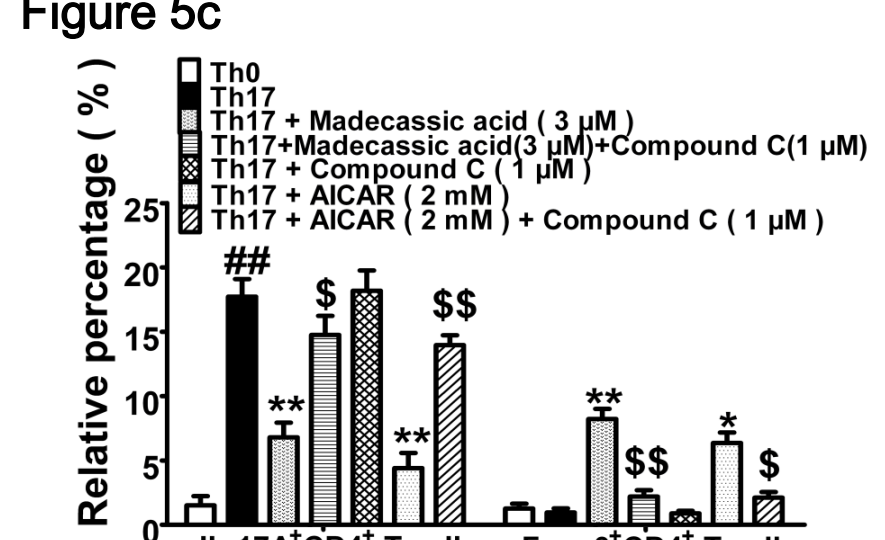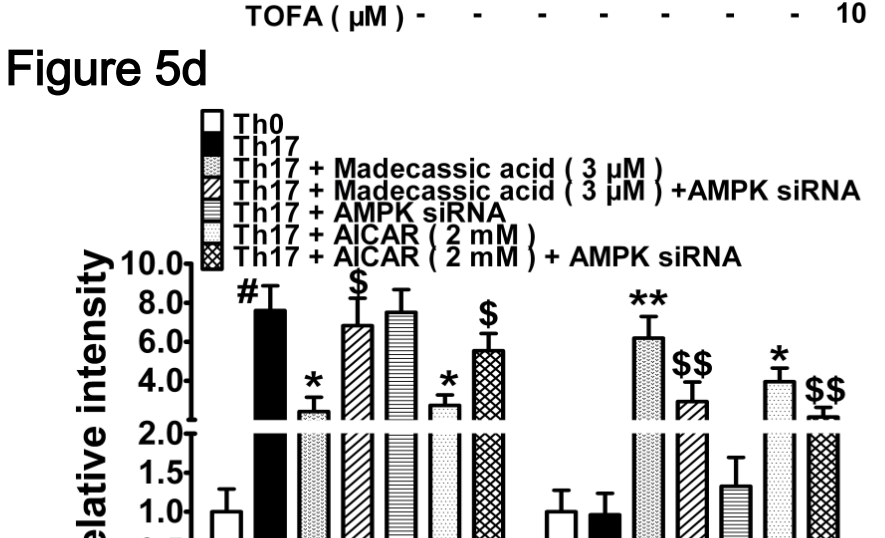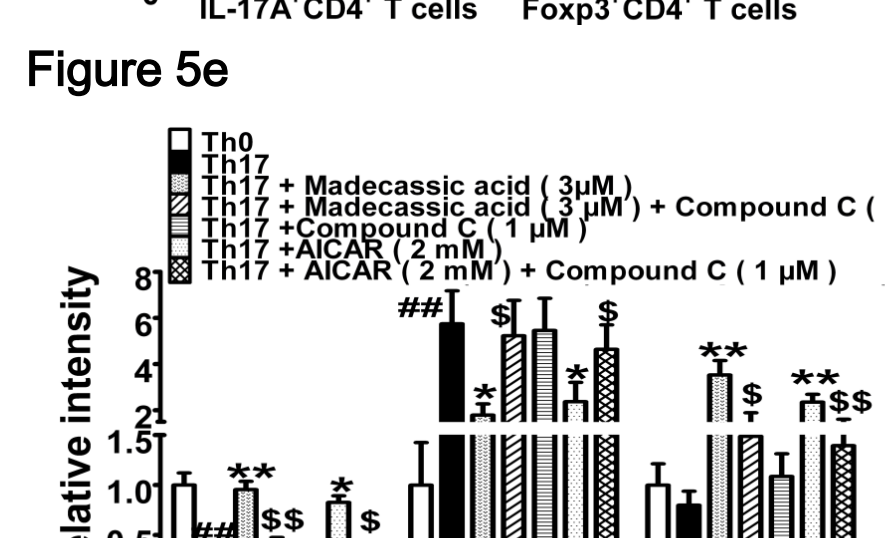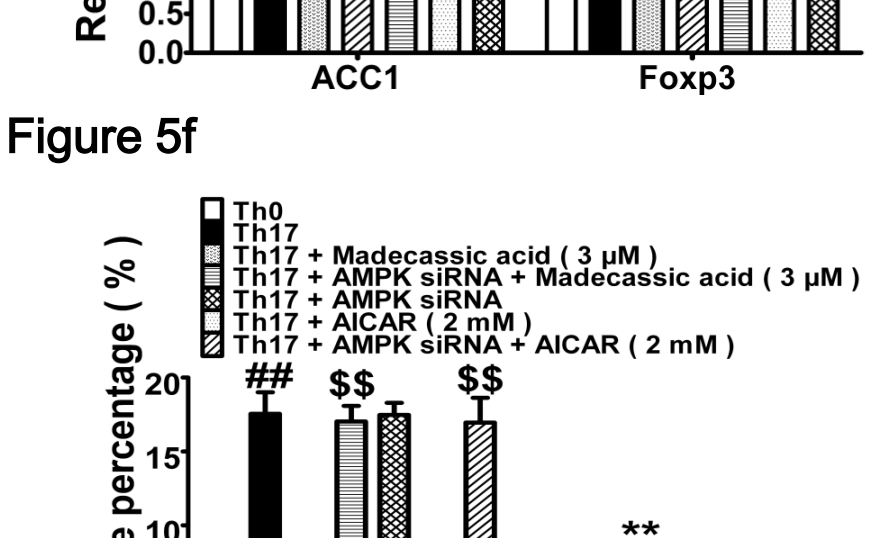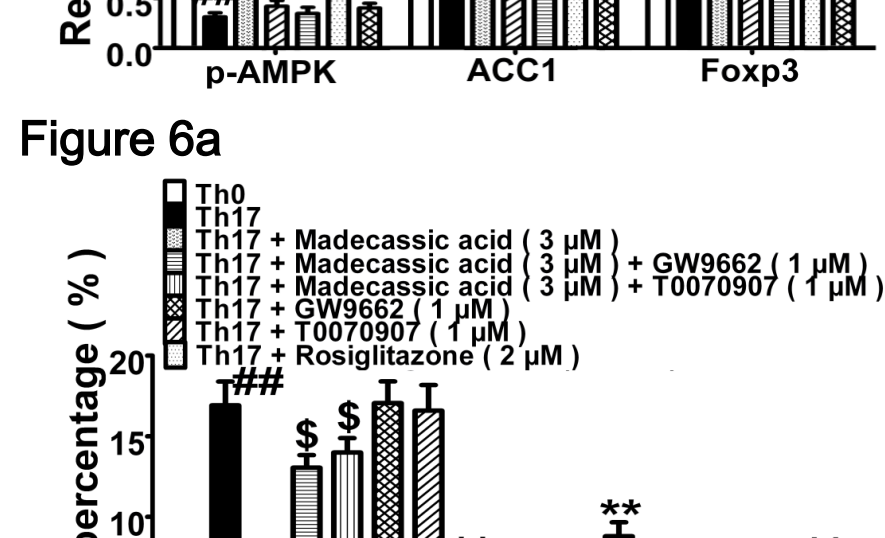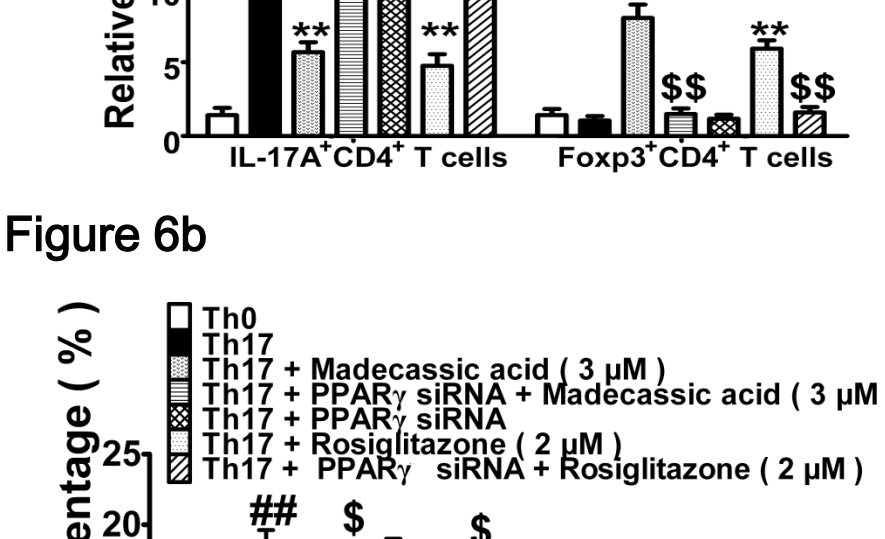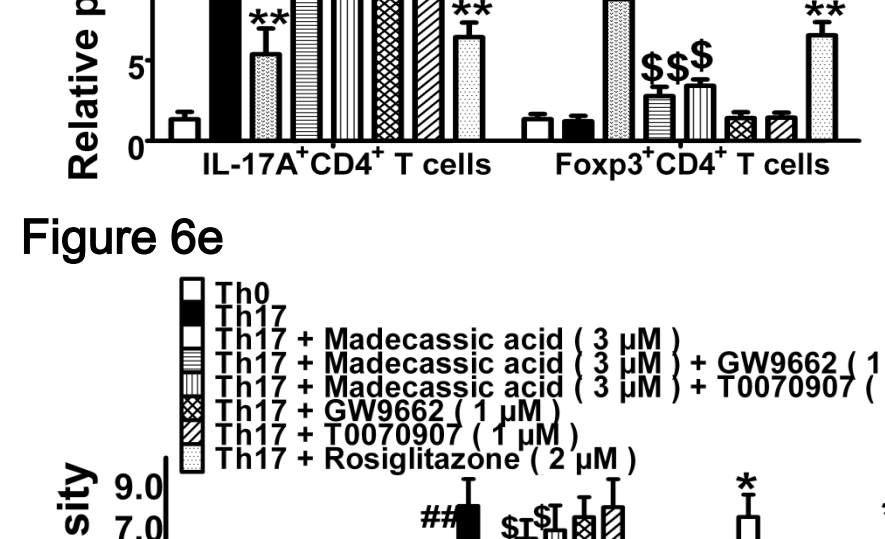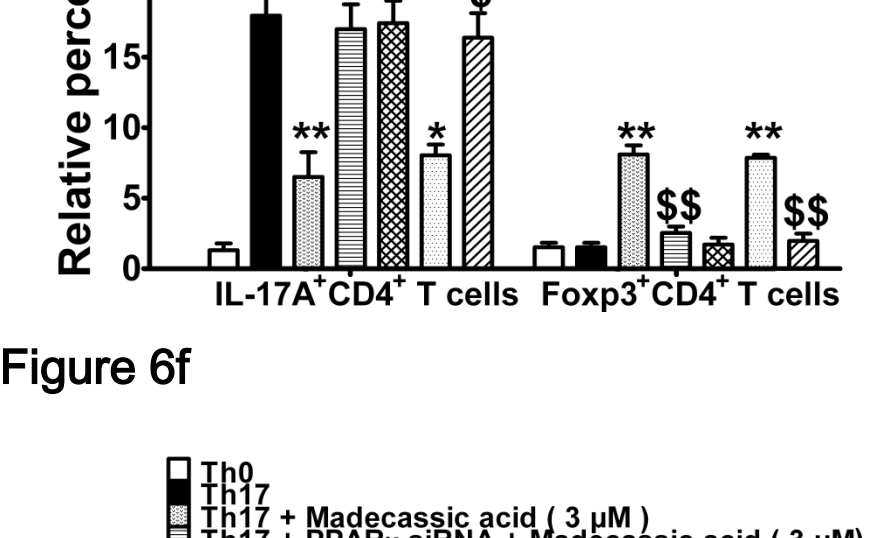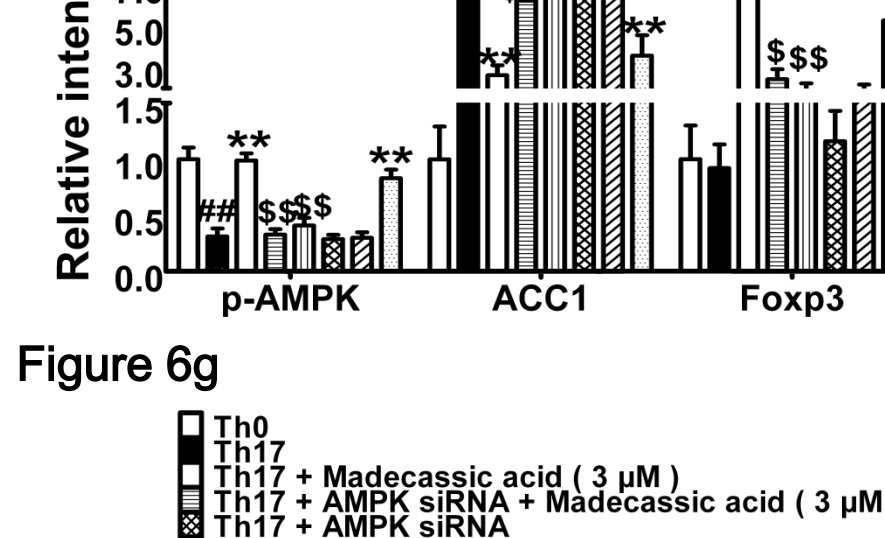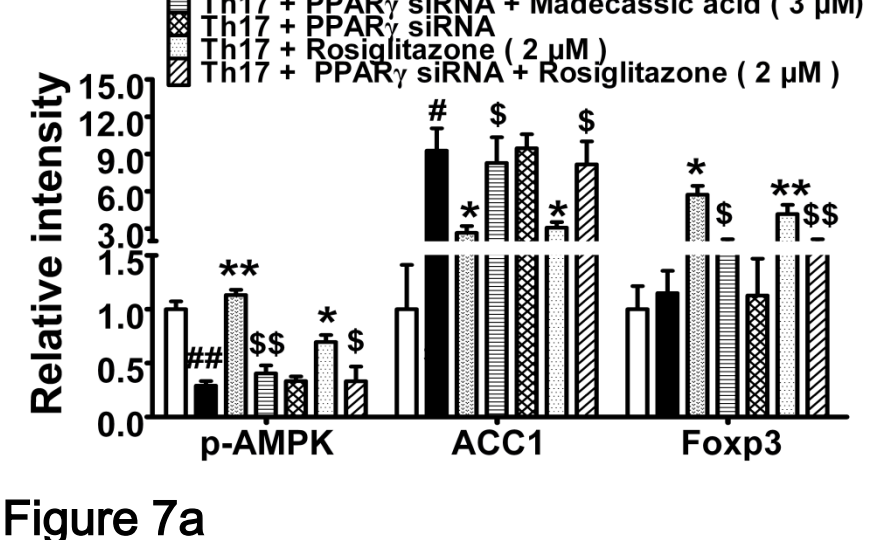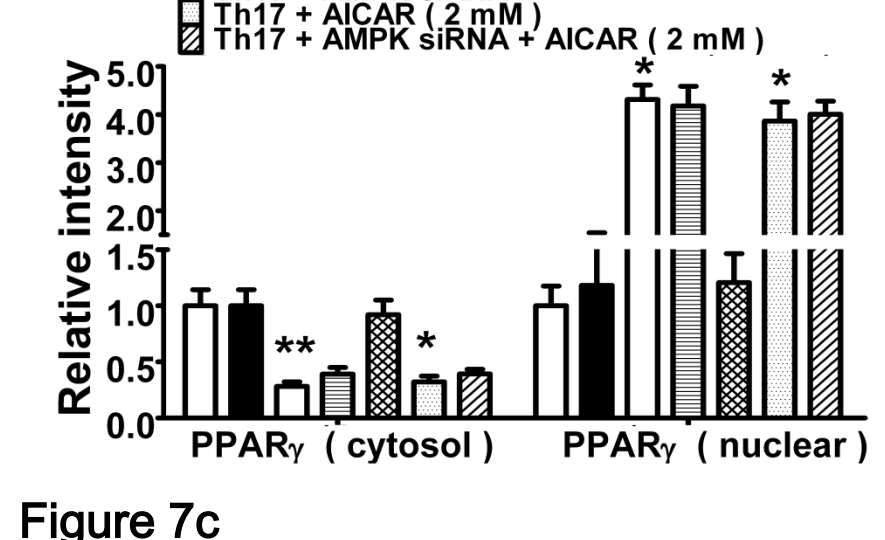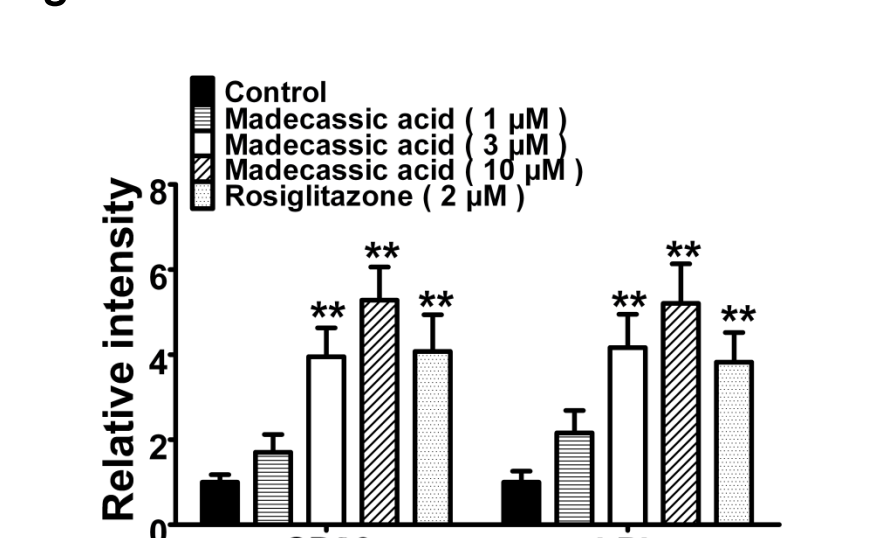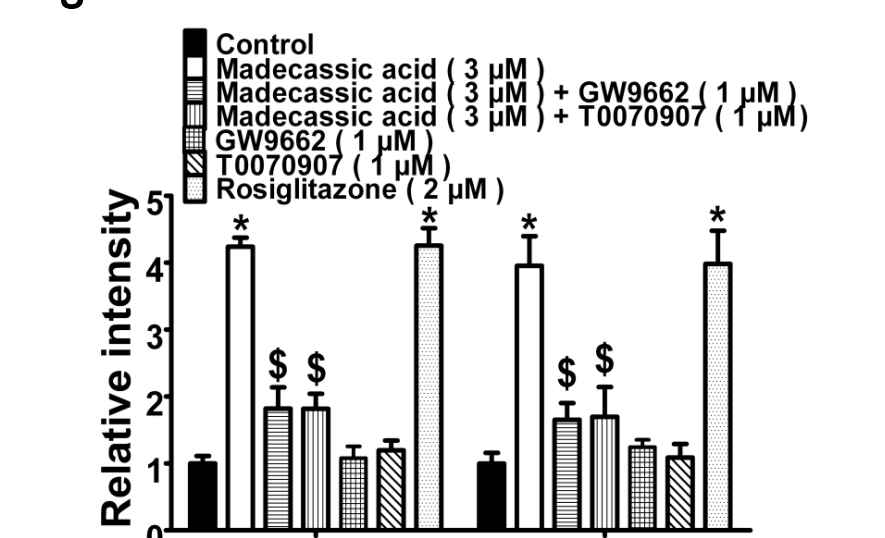

Supplement: cddis2017150x1.pdf [file cddis2017150x1.pdf]
